# Supplementary material for: Evolutionary search for (M©B16)Q (M = Sc–Ni; Q = 0/−1) clusters: bowl/boat vs. tubular shape
Source: Royal Society of Chemistry journal article supplement (doi:10.1039/c9cp03999f), 2019-01-01
Supplement: c9cp03999f1.pdf [file c9cp03999f1.pdf]

Supplementary Information for:

**Evolutionary Search for  $(M@B_{16})^Q$  ( $M=Sc-Ni$ ;  $Q=0/-1$ ) Clusters: Bowl/Boat- vs Tubular-  
Shape**

Zabihollah Mahdaviifar\*, Fazel Shojaei

Department of Chemistry, Faculty of Science, Shahid Chamran University of Ahvaz, Ahvaz, Iran

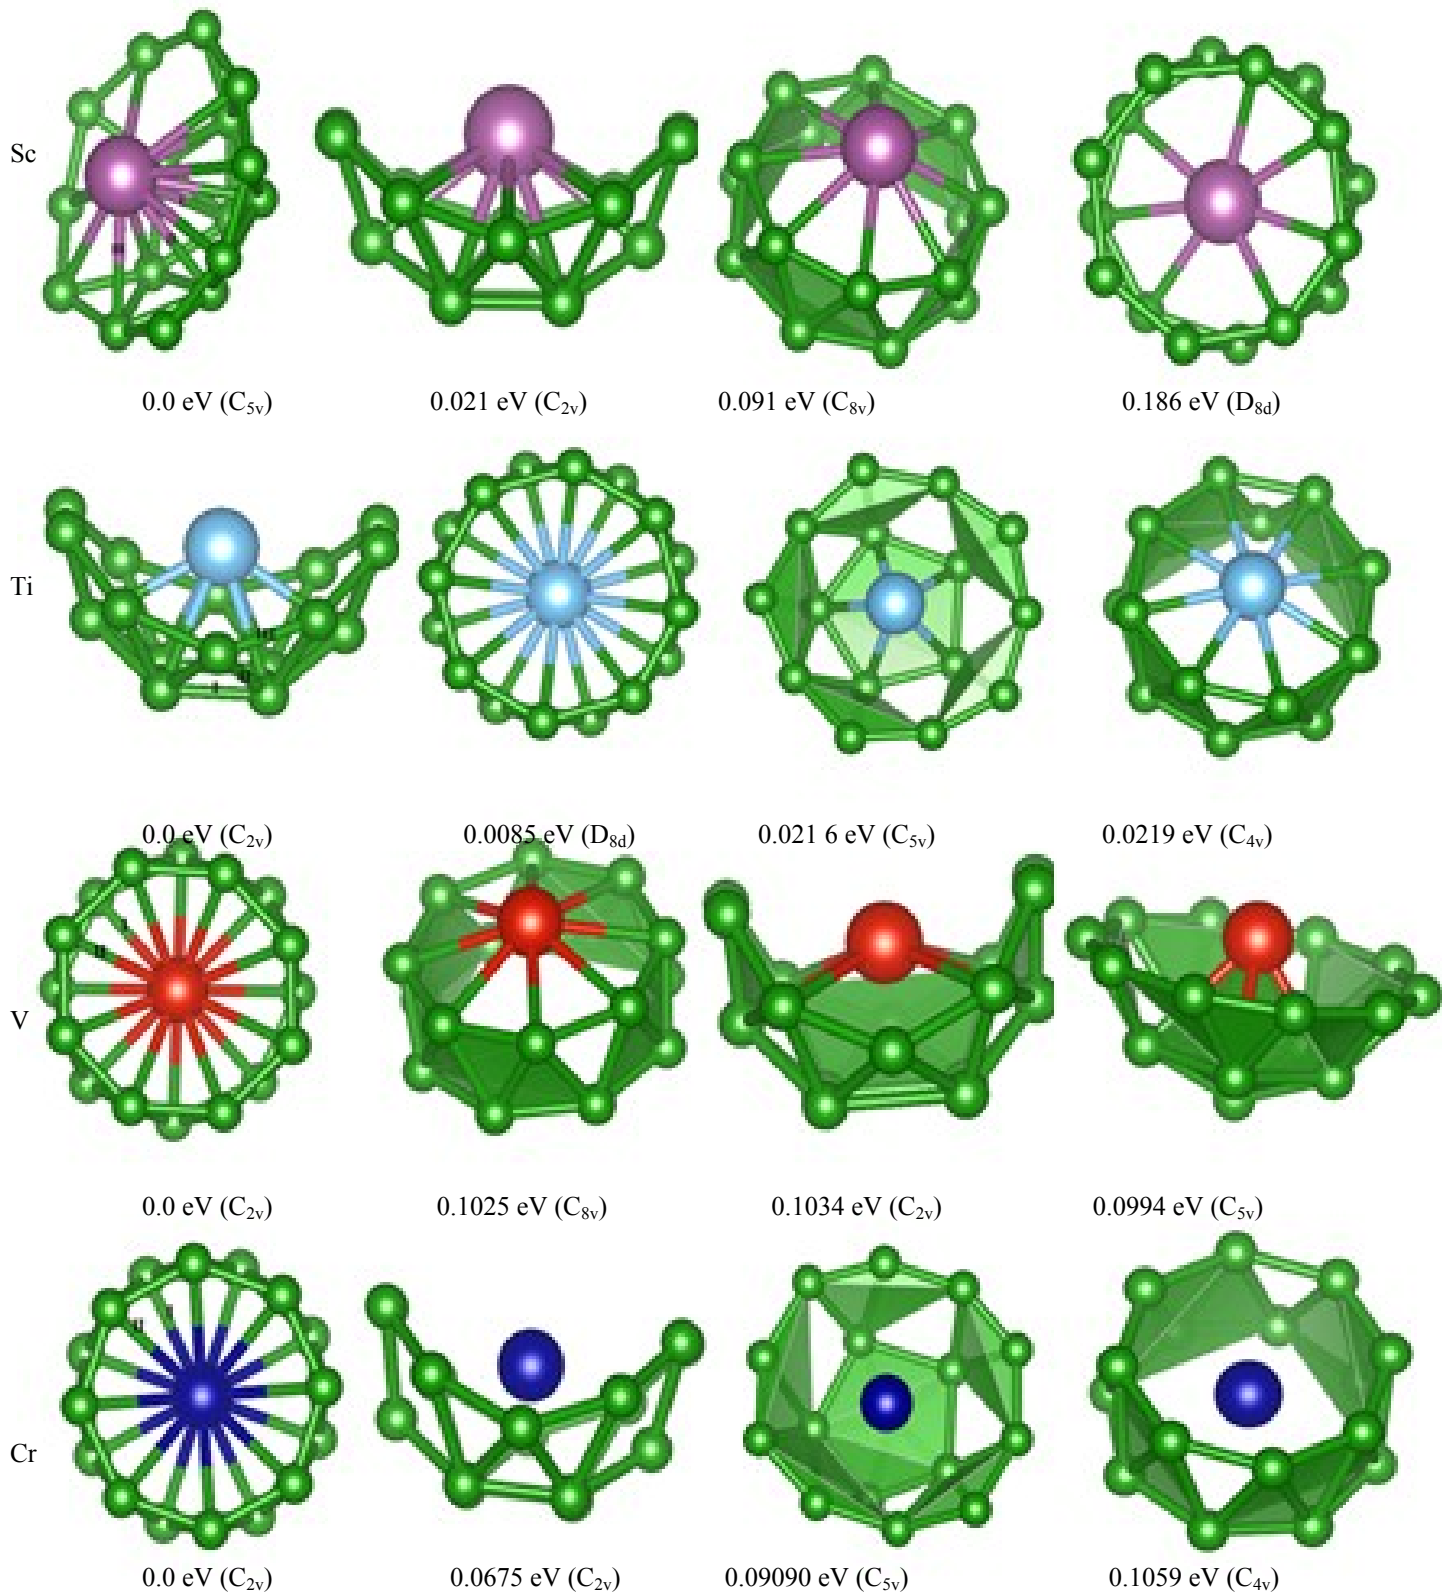

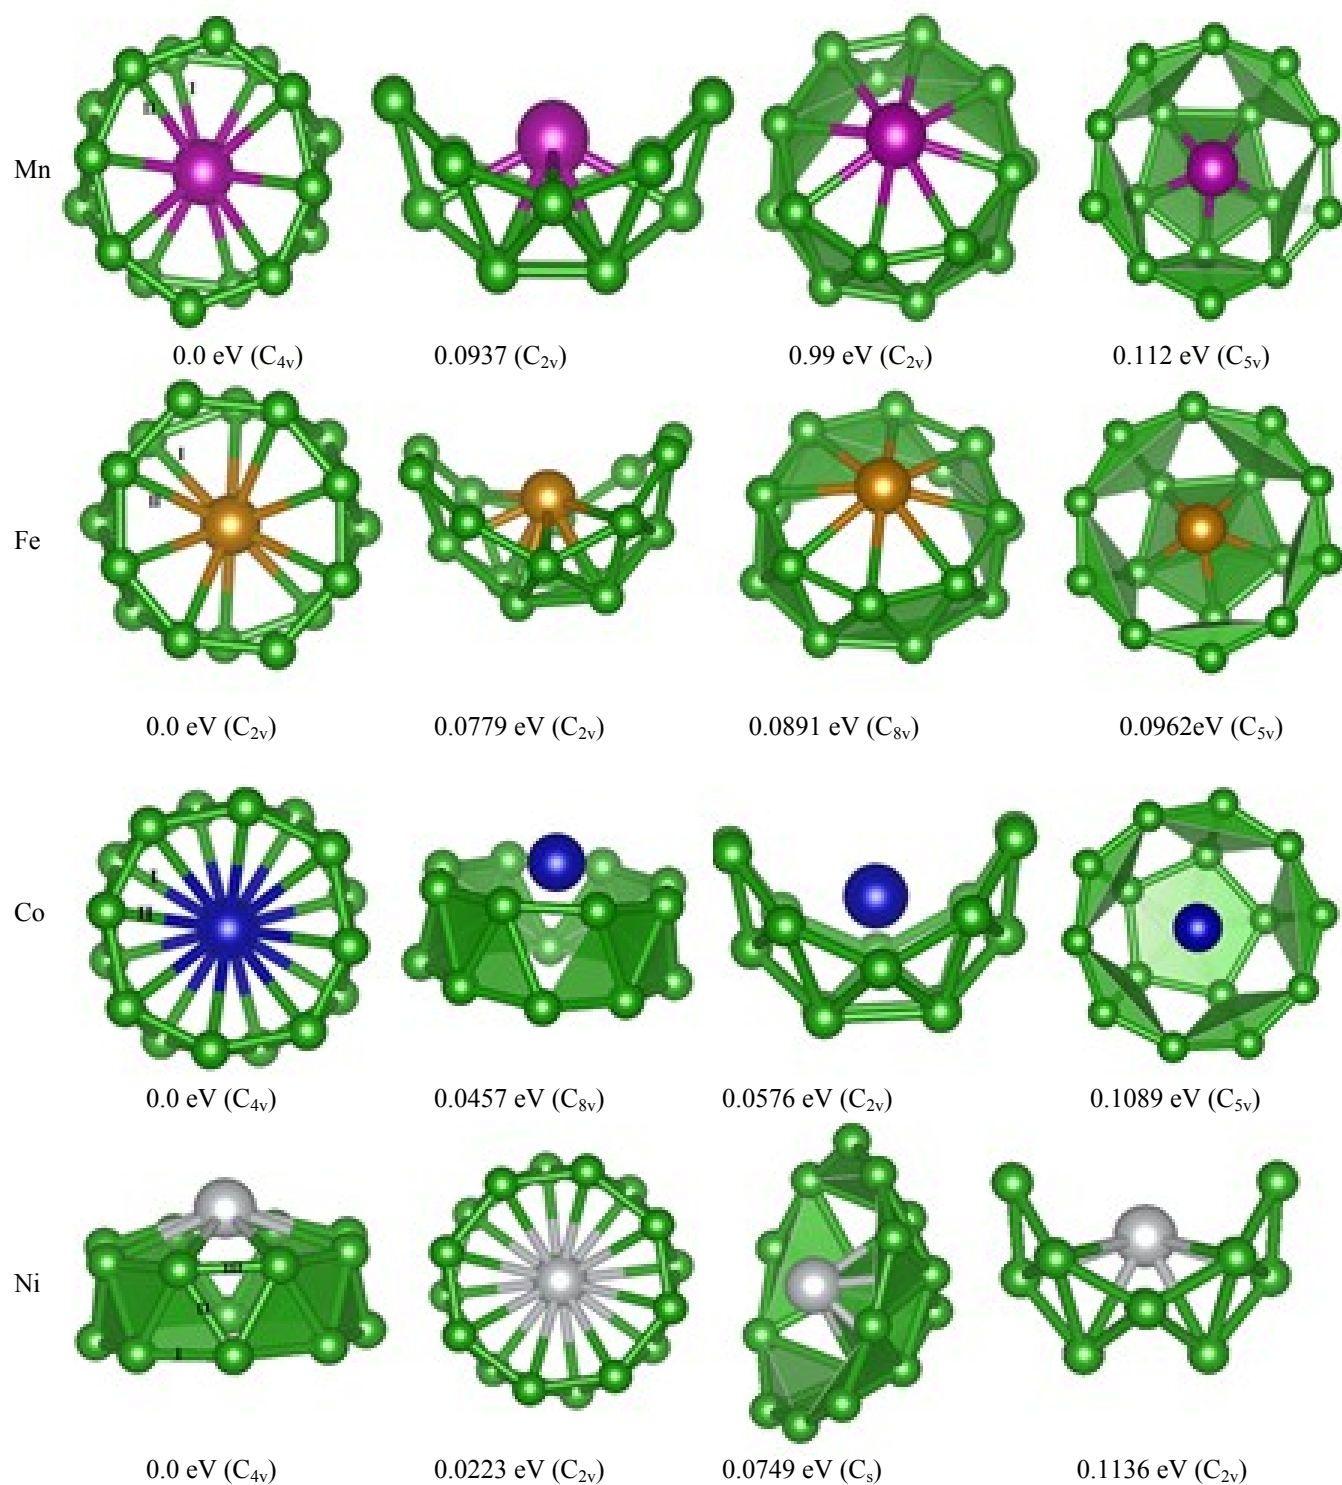

**Figure S1:** The most stable structure with some low-lying isomers of  $(M@B_{16})^{-1}$  species. The wheel-shaped (M atom located on the center of tubular  $B_{16}$  species) for the  $M = V, Cr, Mn, Fe, Co$  is the lowest-energy. For Ni metal atom, the drum-shaped, where the M atom located out of the tubular  $B_{16}$  motif is the most stable structure; For the Sc and Ti the bowl and boat structures are the most stable structure, respectively. In the case of Cr, the drum shaped after re-optimization converted to the wheel shaped.

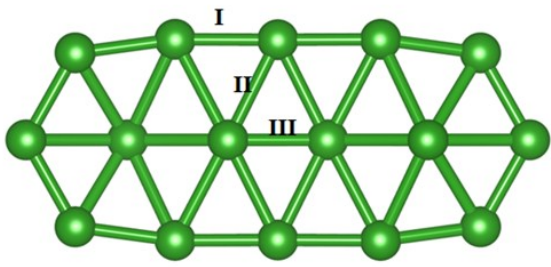

$(B_{16})^0$

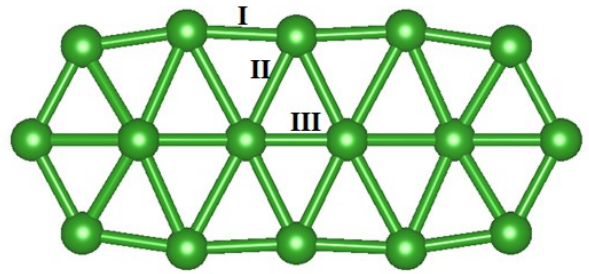

$(B_{16})^{-1}$

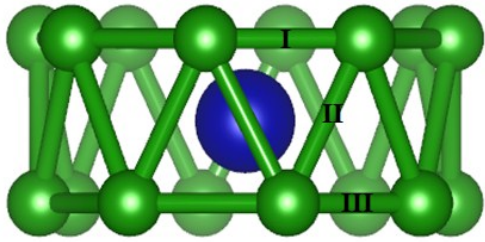

$(in-Co@B_{16})^0$

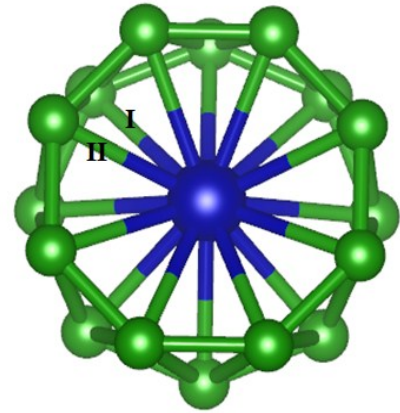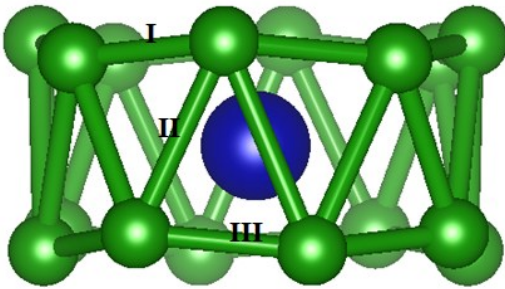

$in-(Co@B_{16})^{-1}$

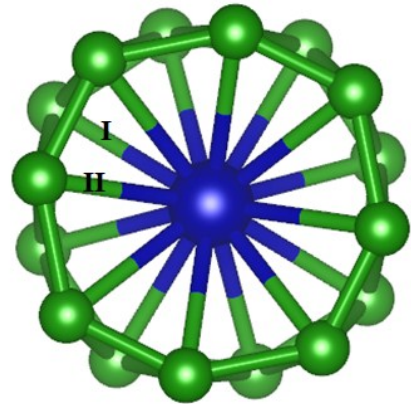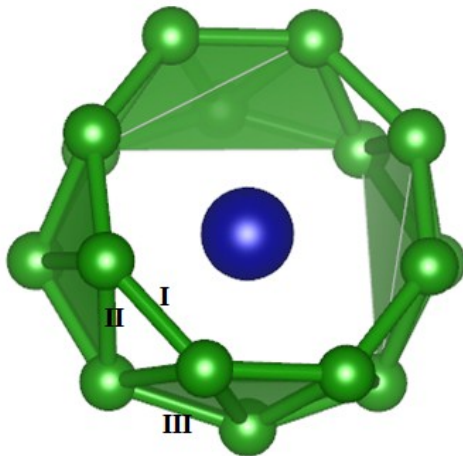

$in-(Cr@B_{16})^0$

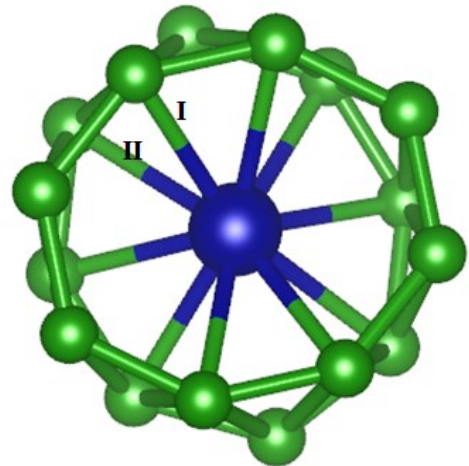

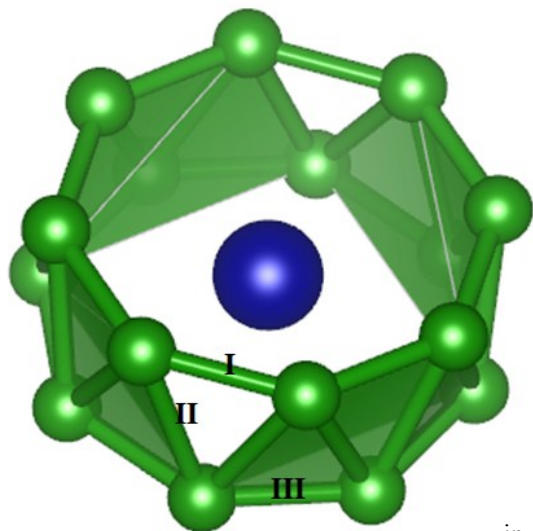

in-(Cr@B<sub>16</sub>)<sup>-1</sup>

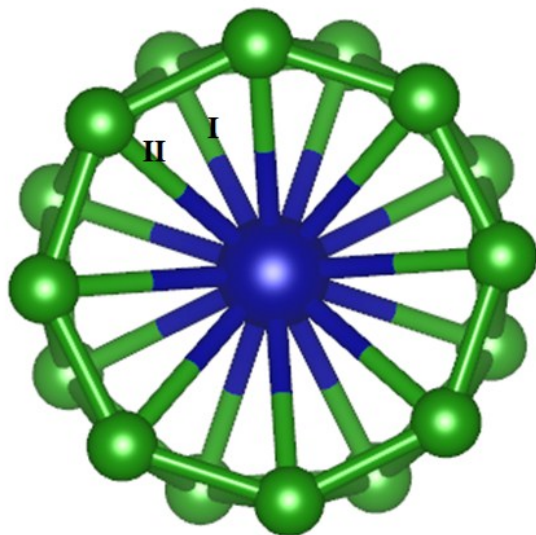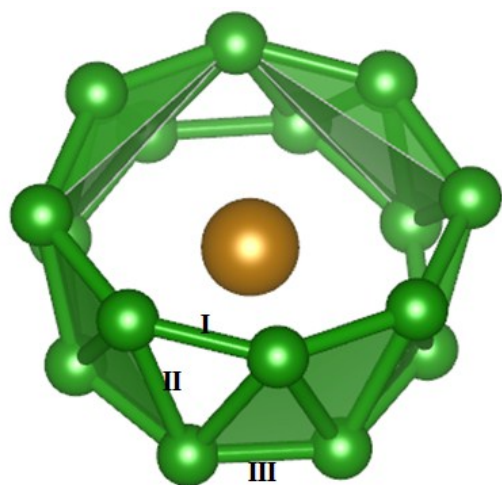

in-(Fe@B<sub>16</sub>)<sup>0</sup>

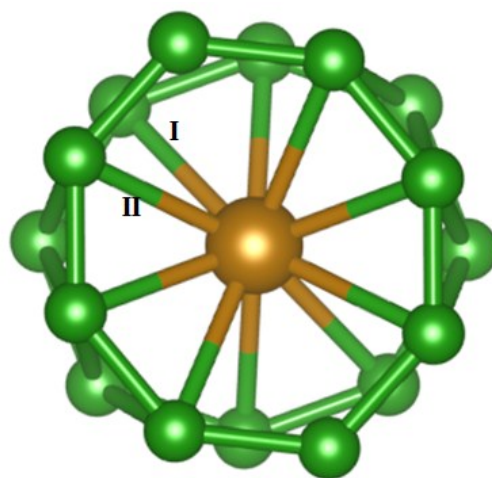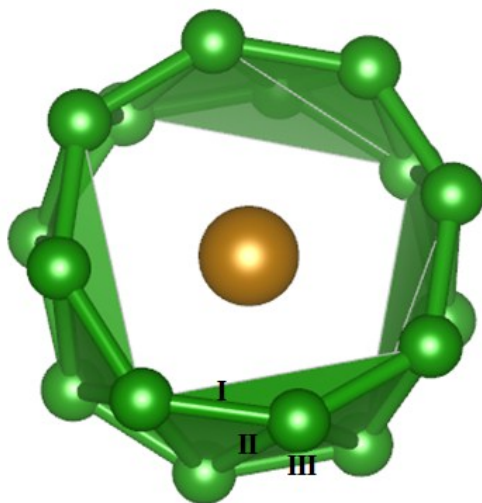

in-(Fe@B<sub>16</sub>)<sup>-1</sup>

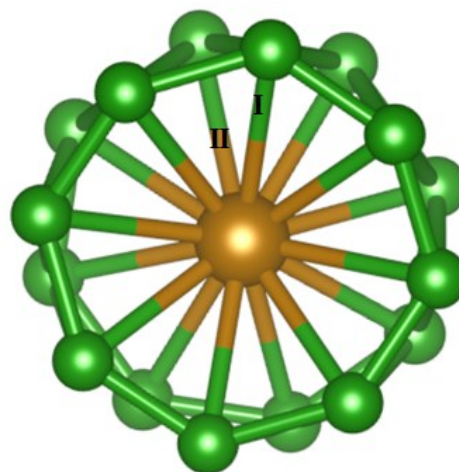

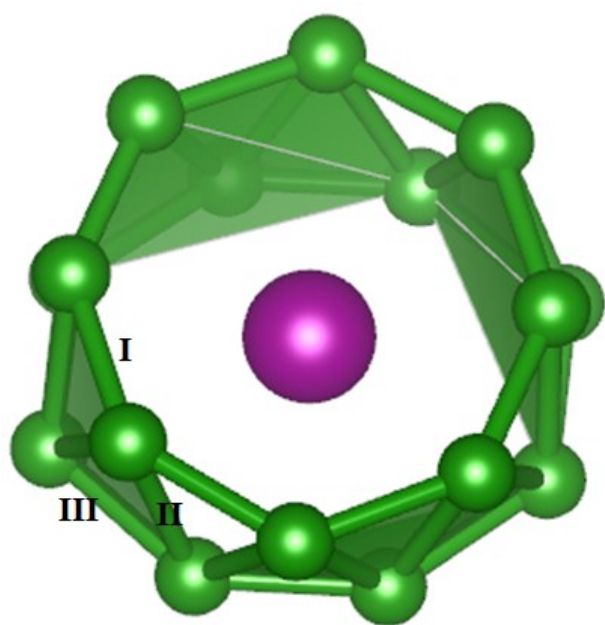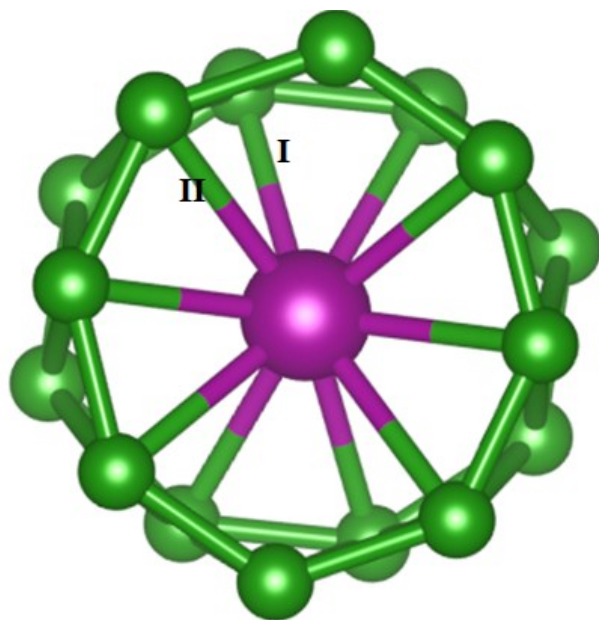

(in-Mn@B<sub>16</sub>)<sup>0</sup>

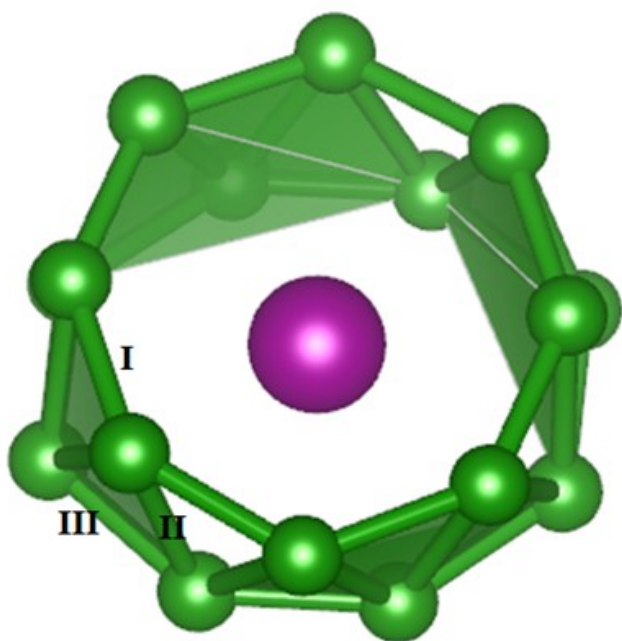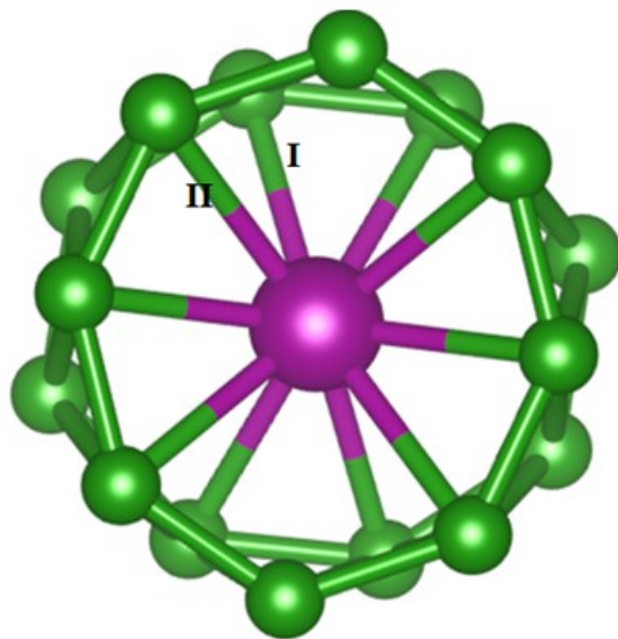

in-(Mn@B<sub>16</sub>)<sup>-1</sup>

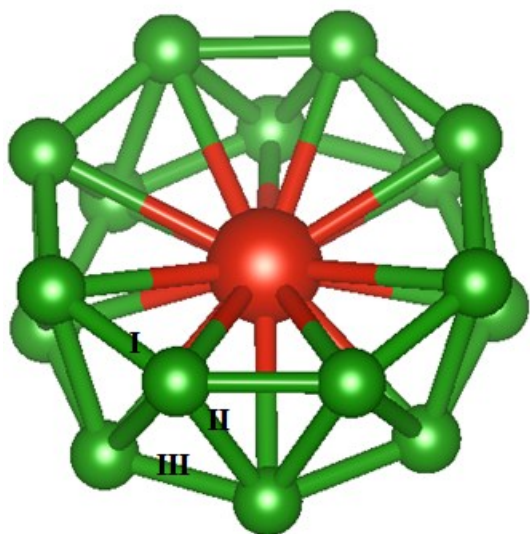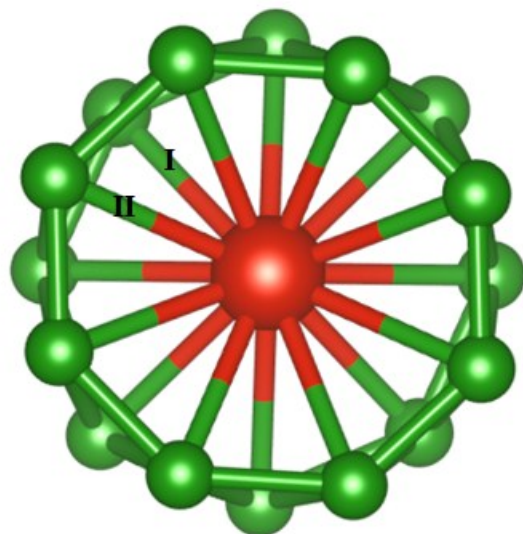

in-(VCB<sub>16</sub>)<sup>0</sup>

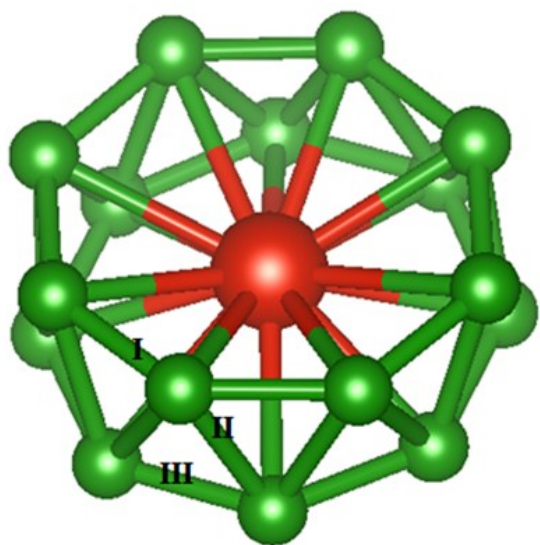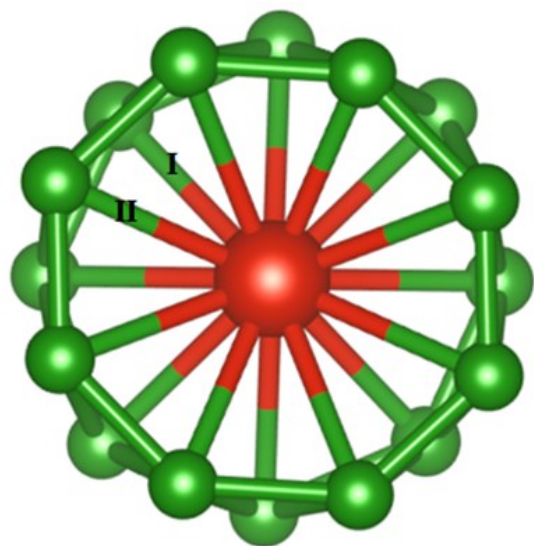

(in-VCB<sub>16</sub>)<sup>-1</sup>

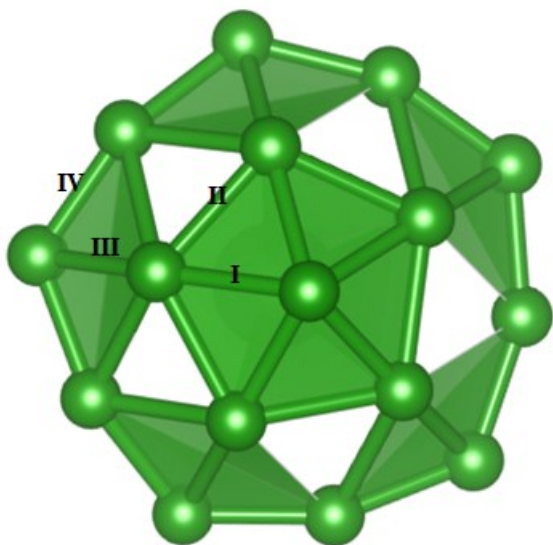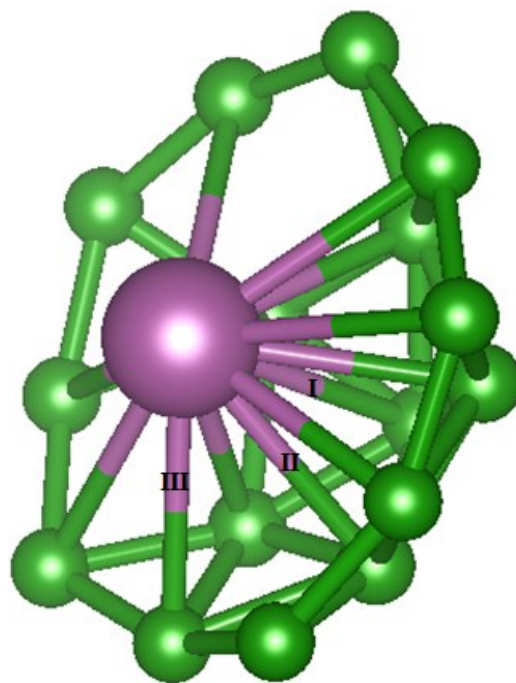

(bowl-Sc@B<sub>16</sub>)<sup>0</sup>

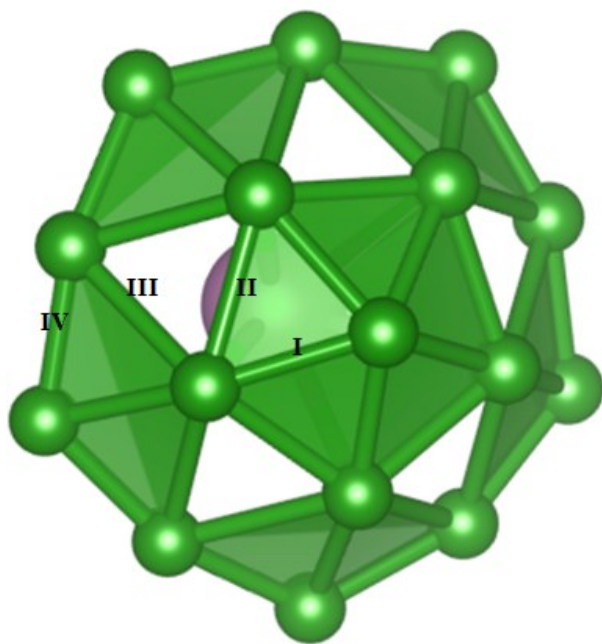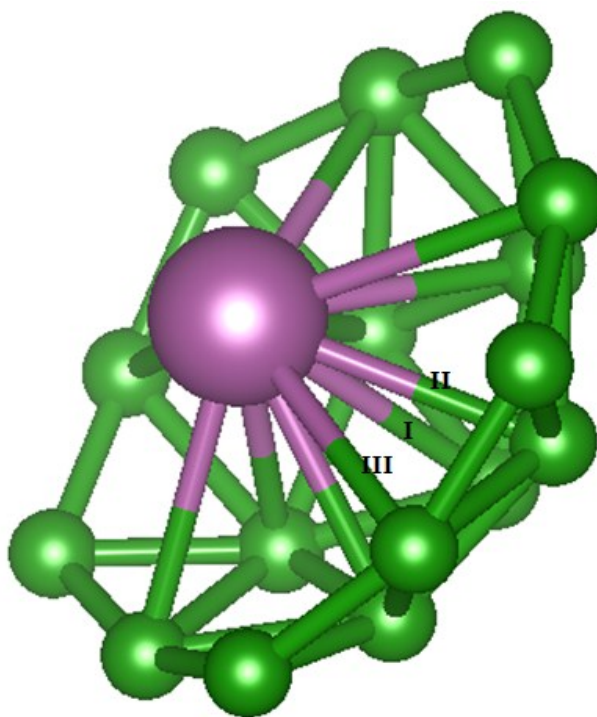

bowl-(Sc@B<sub>16</sub>)<sup>-1</sup>



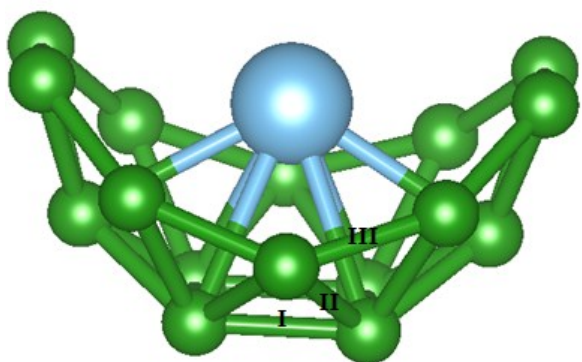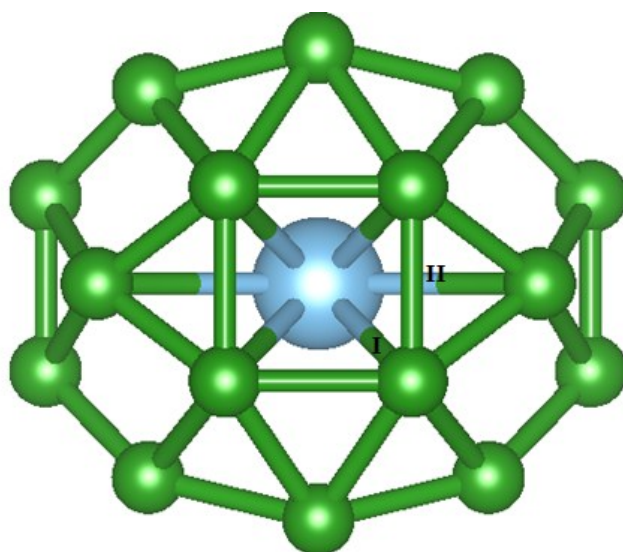

(boat-Ti@B<sub>16</sub>)<sup>0</sup>

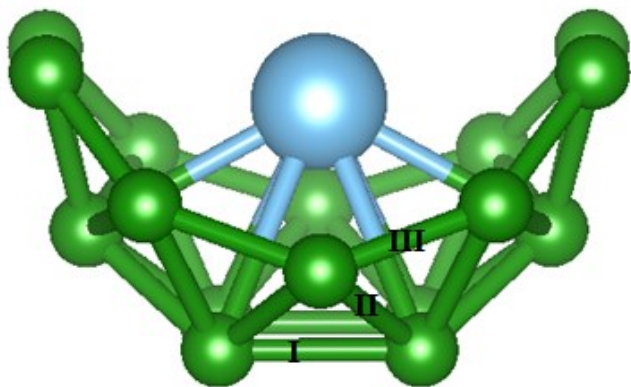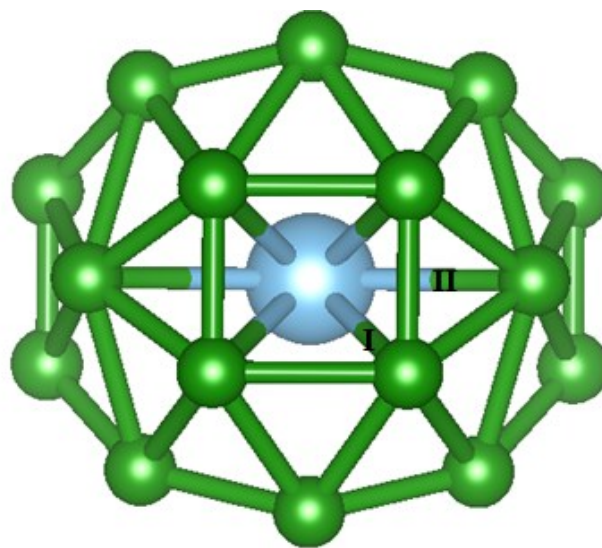

boat-(Ti@B<sub>16</sub>)<sup>-1</sup>

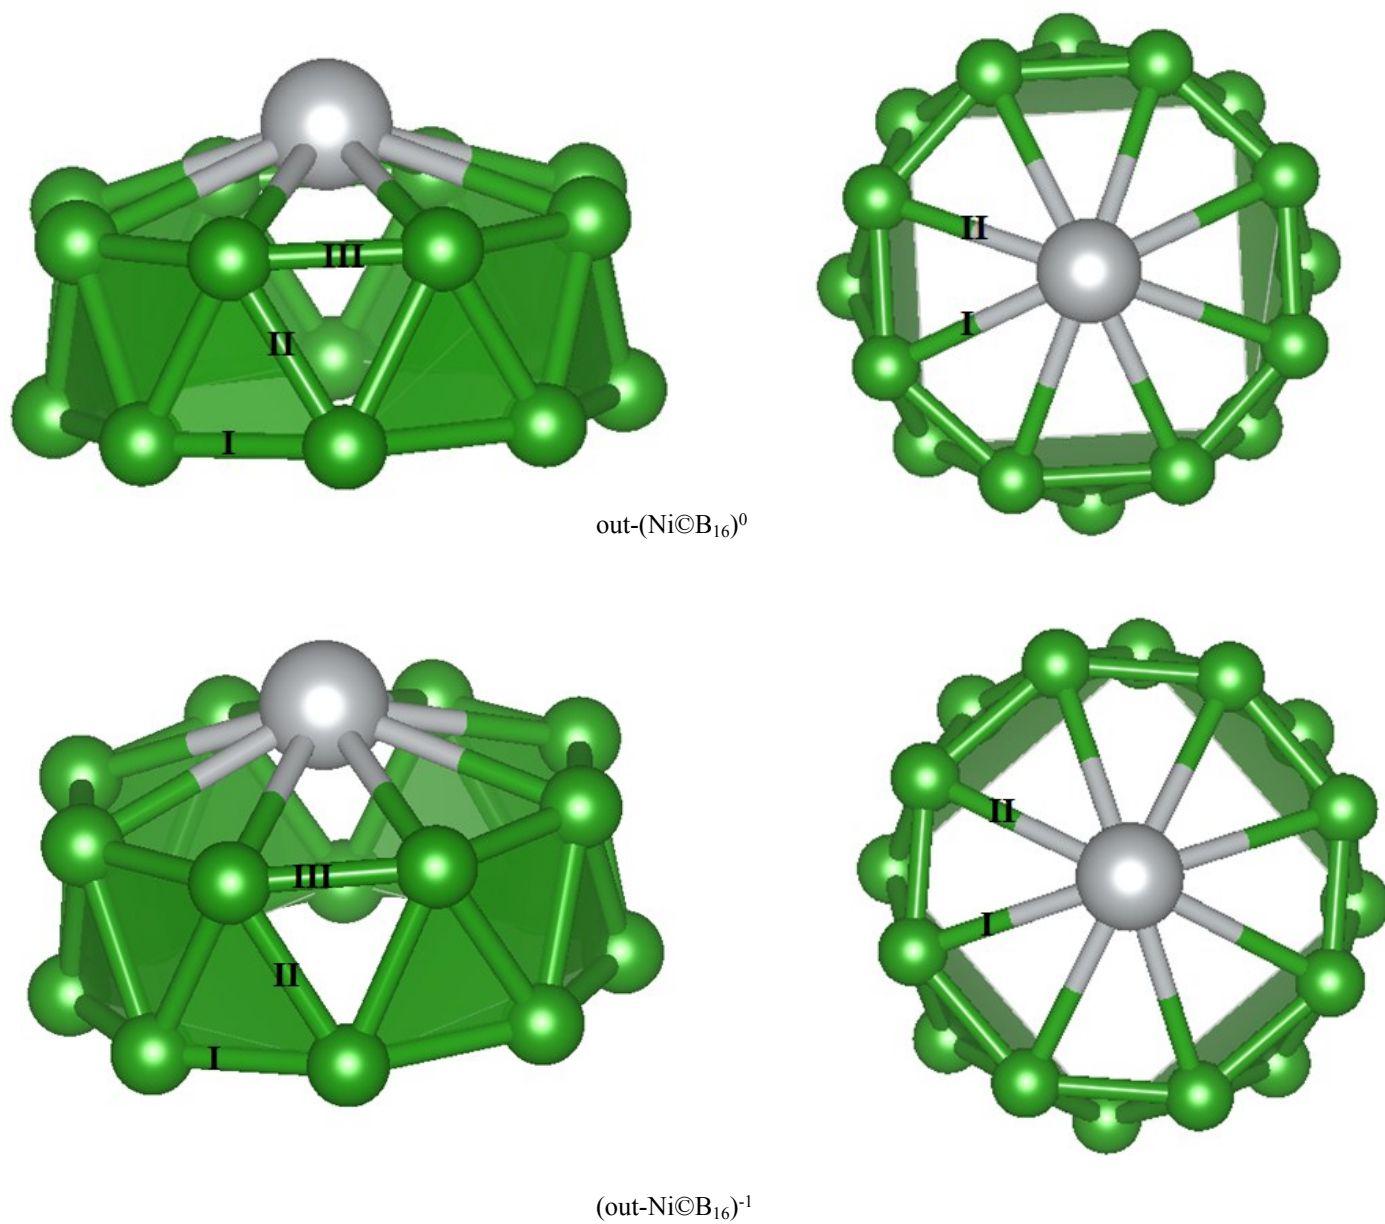

**Figure S2:** Relaxed geometry of the most stable structure of (B<sub>16</sub>)<sup>0</sup> and (M@B<sub>16</sub>)<sup>0</sup> clusters obtained at HSE06 level of theory.

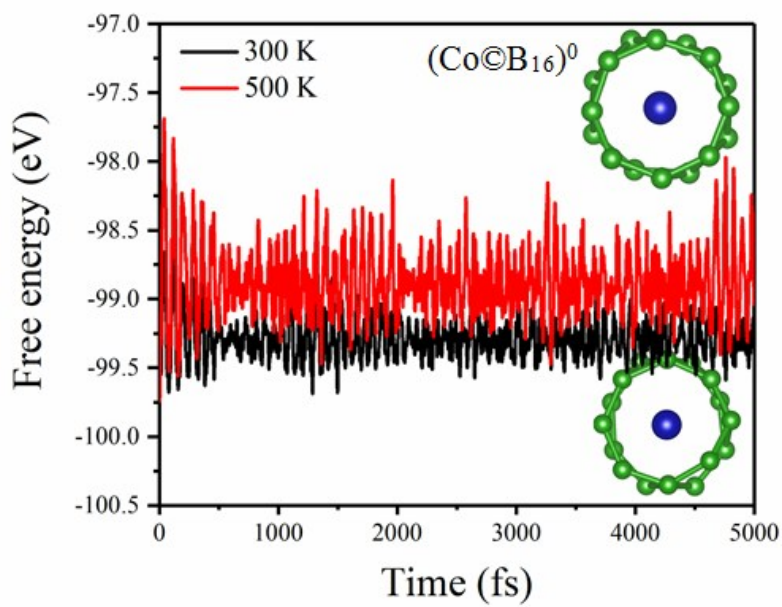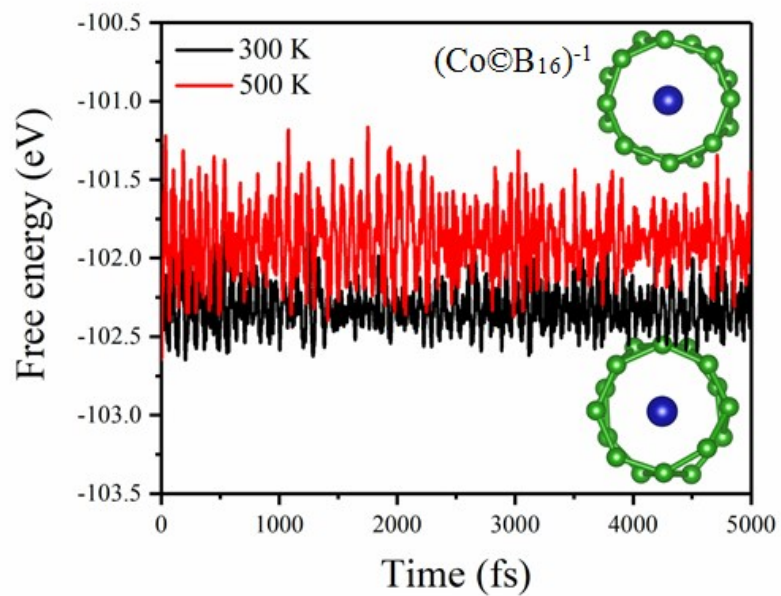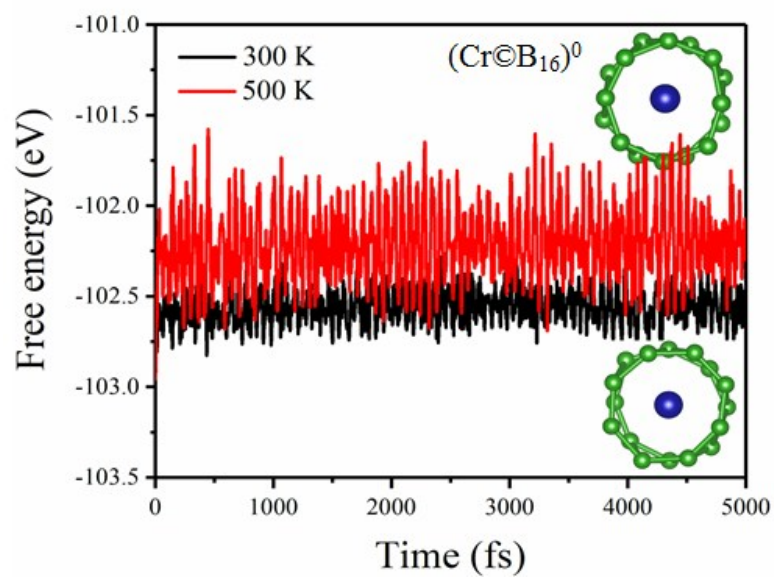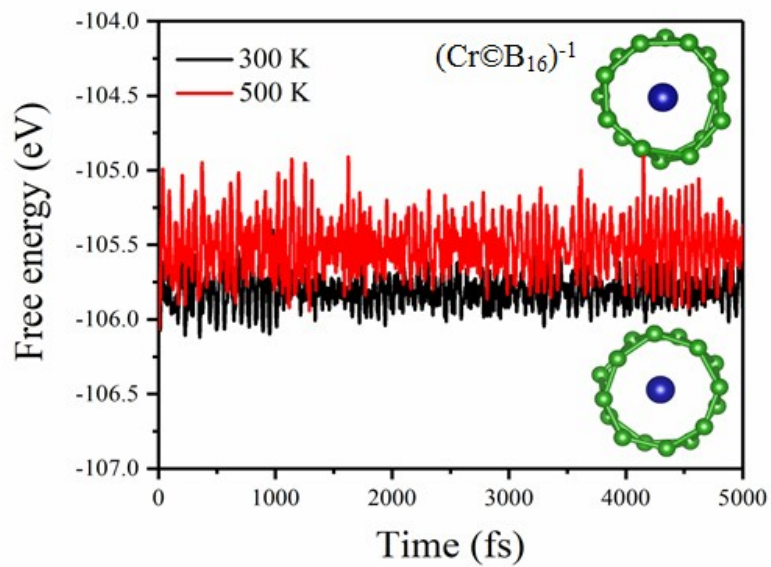

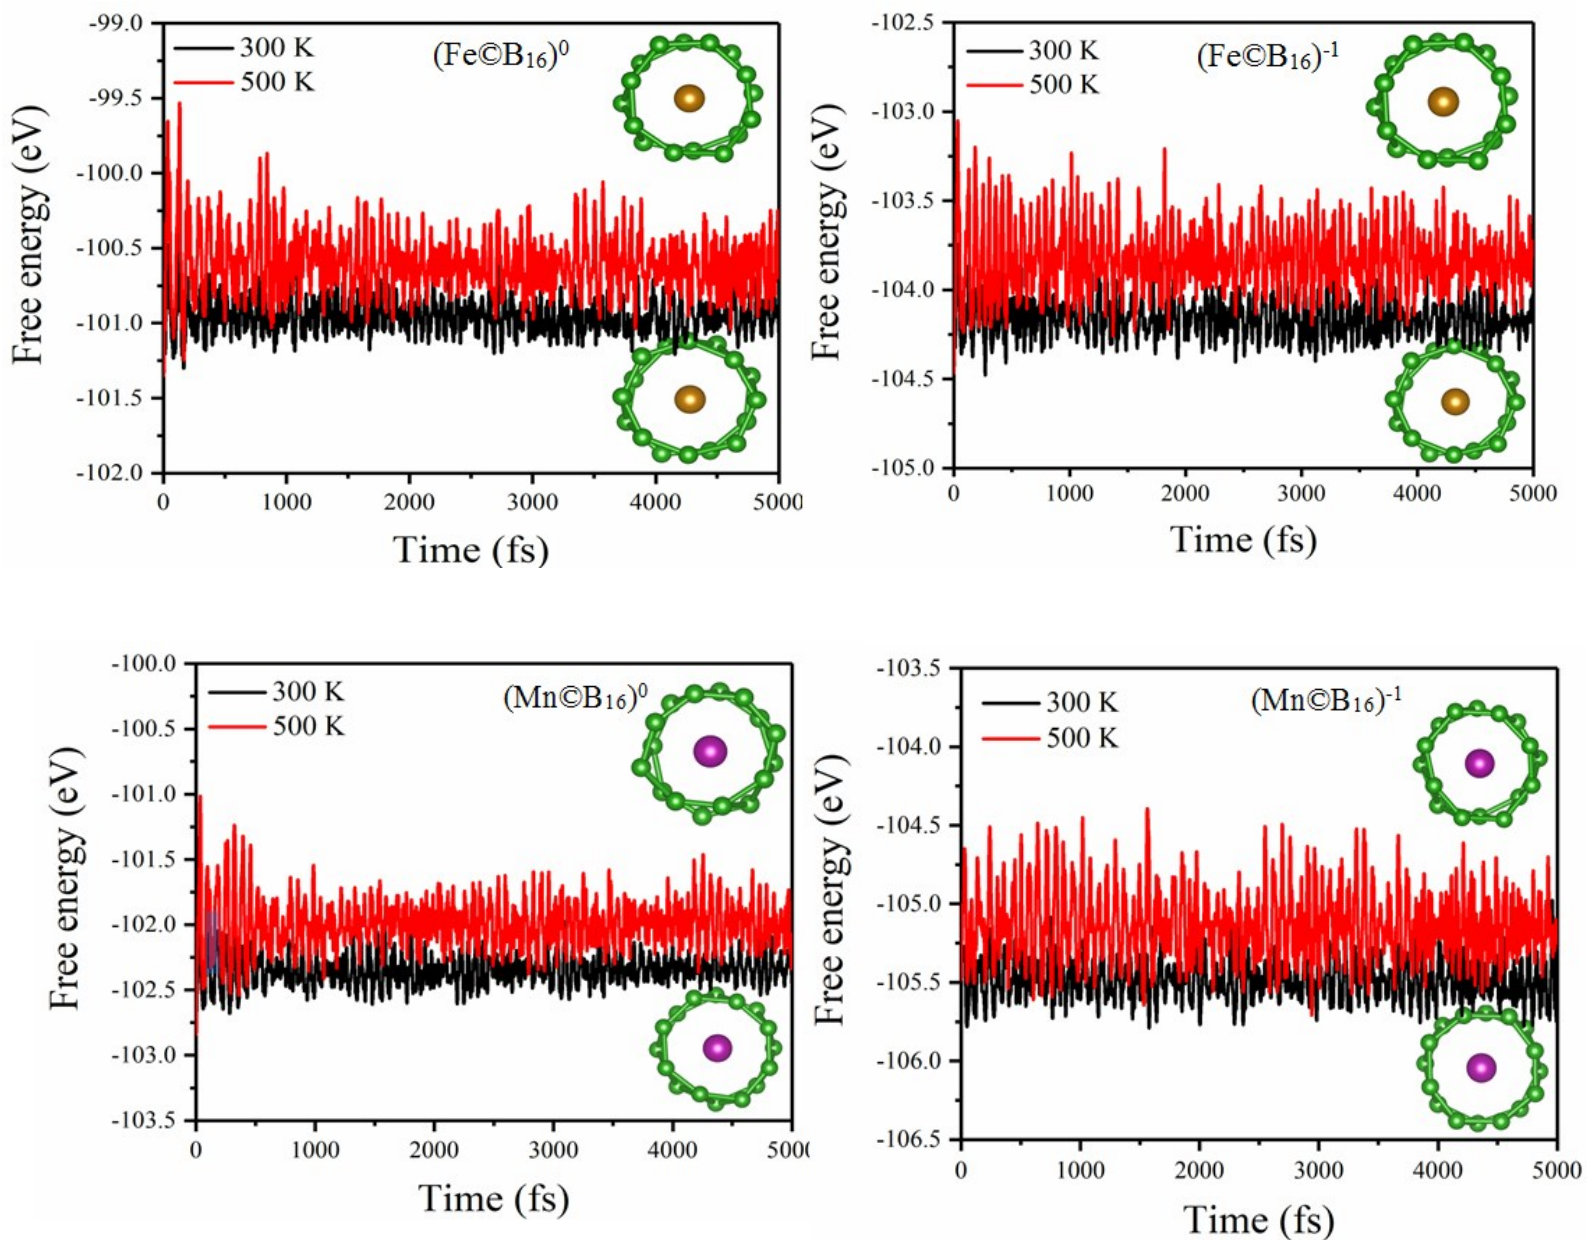

**Figure S3:** The snapshots of the most stable structures for a time of 5 ps. The temperature of the AIMD was set to 300 and 500 K.

negative

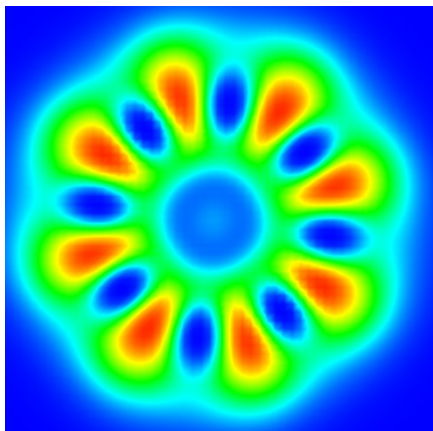

neutral

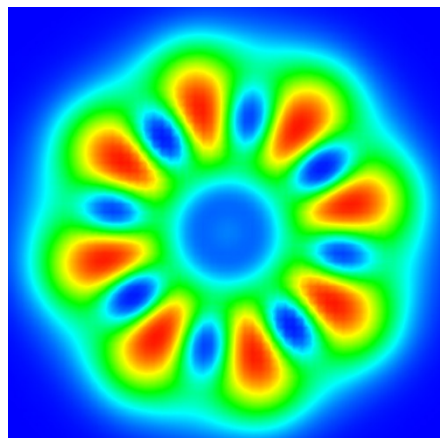

in\_Co@B<sub>16</sub>

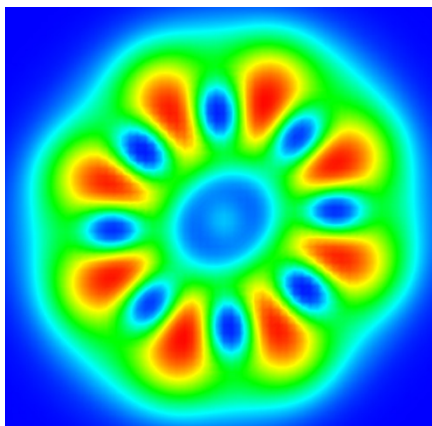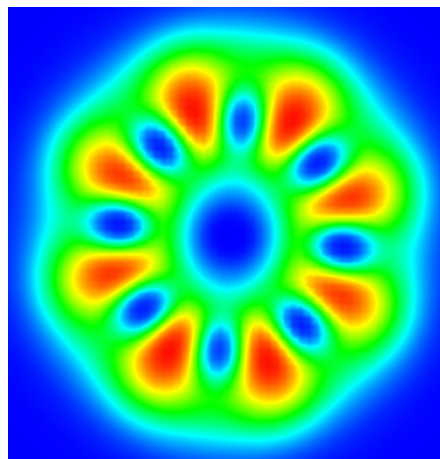

in\_Cr@B<sub>16</sub>

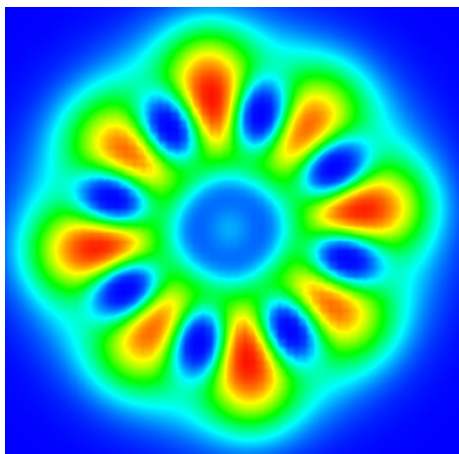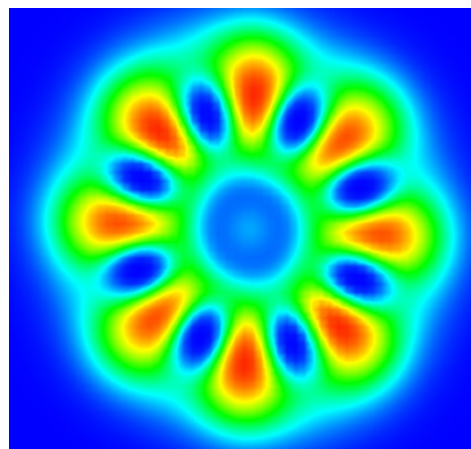

in\_Fe@B<sub>16</sub>

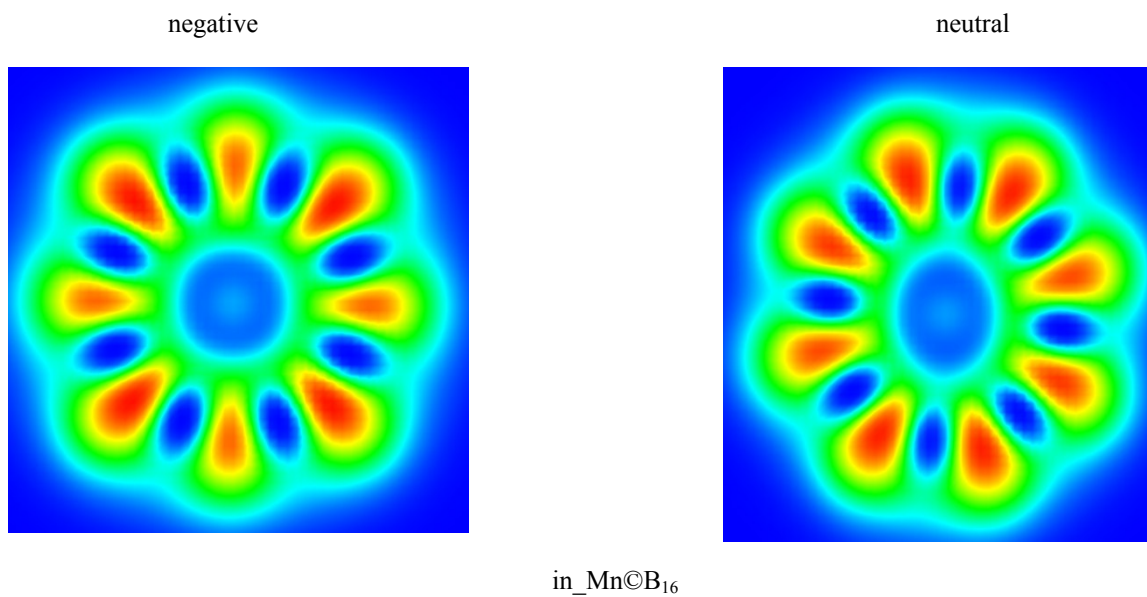

**Figure S4:** Contour plots of ELF for negative ( $q=-1$ ) and neutral ( $q=0$ ) most stable structure of  $M@B_{16}$  clusters computed at HSE06 level of theory.

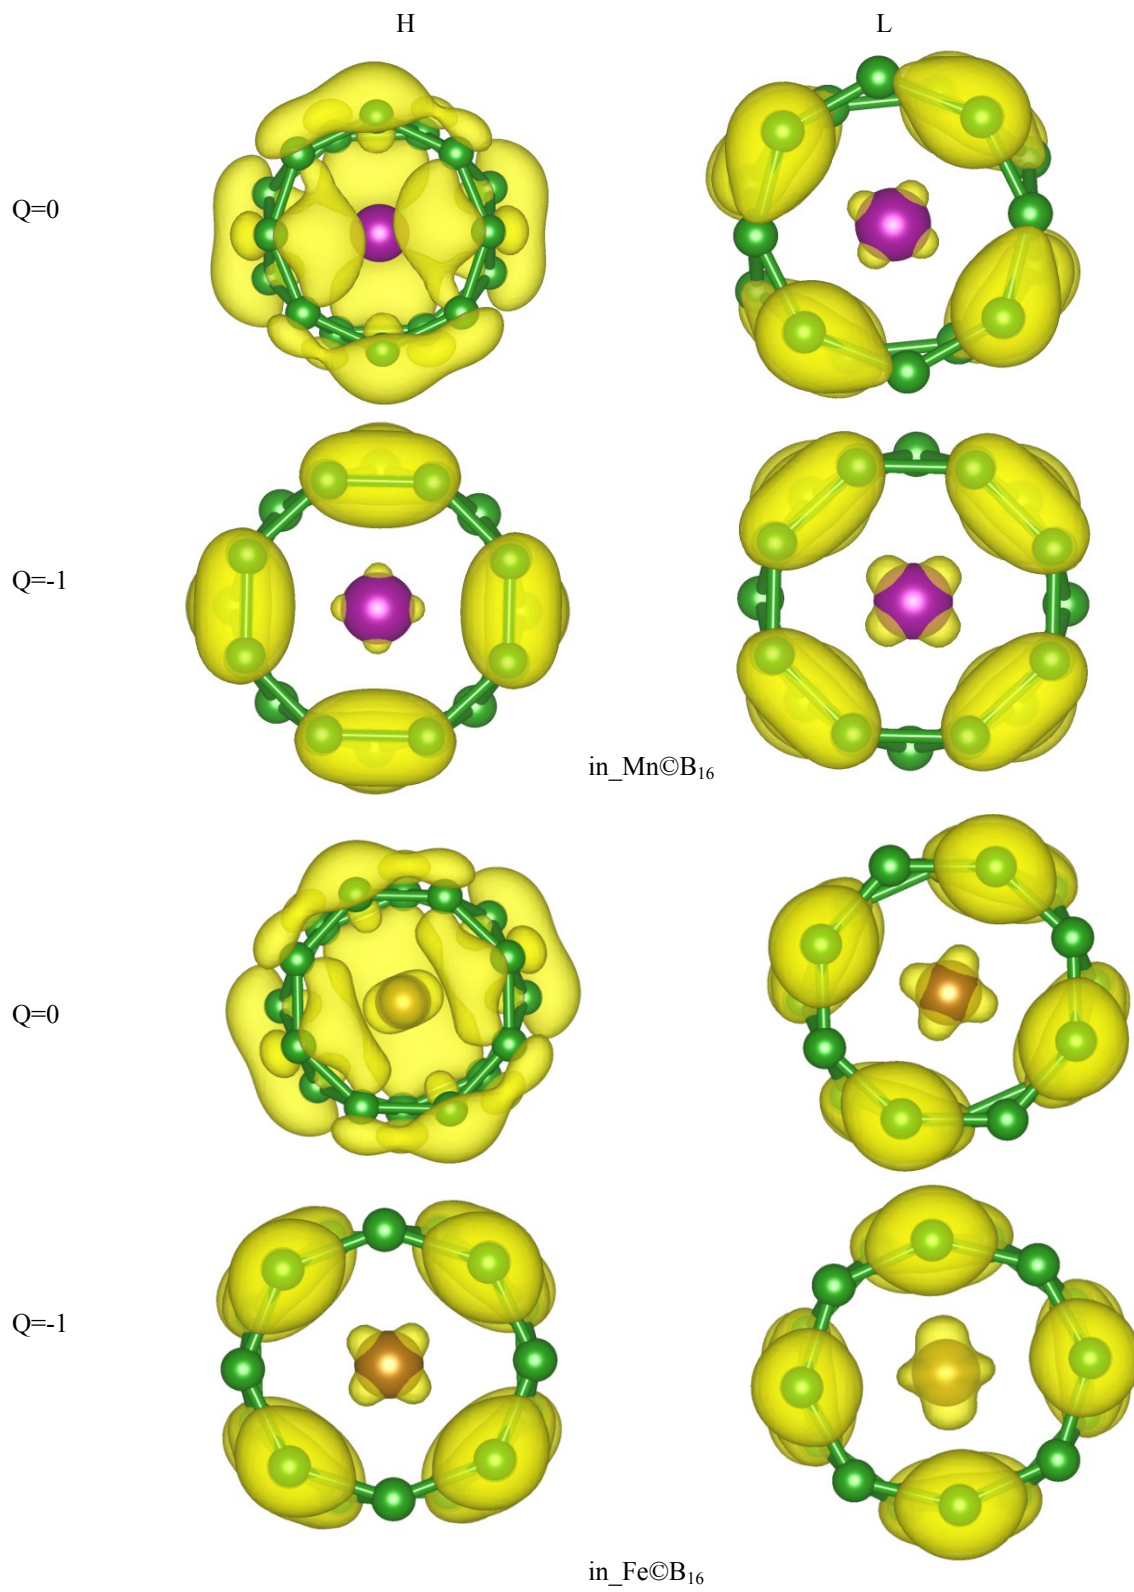

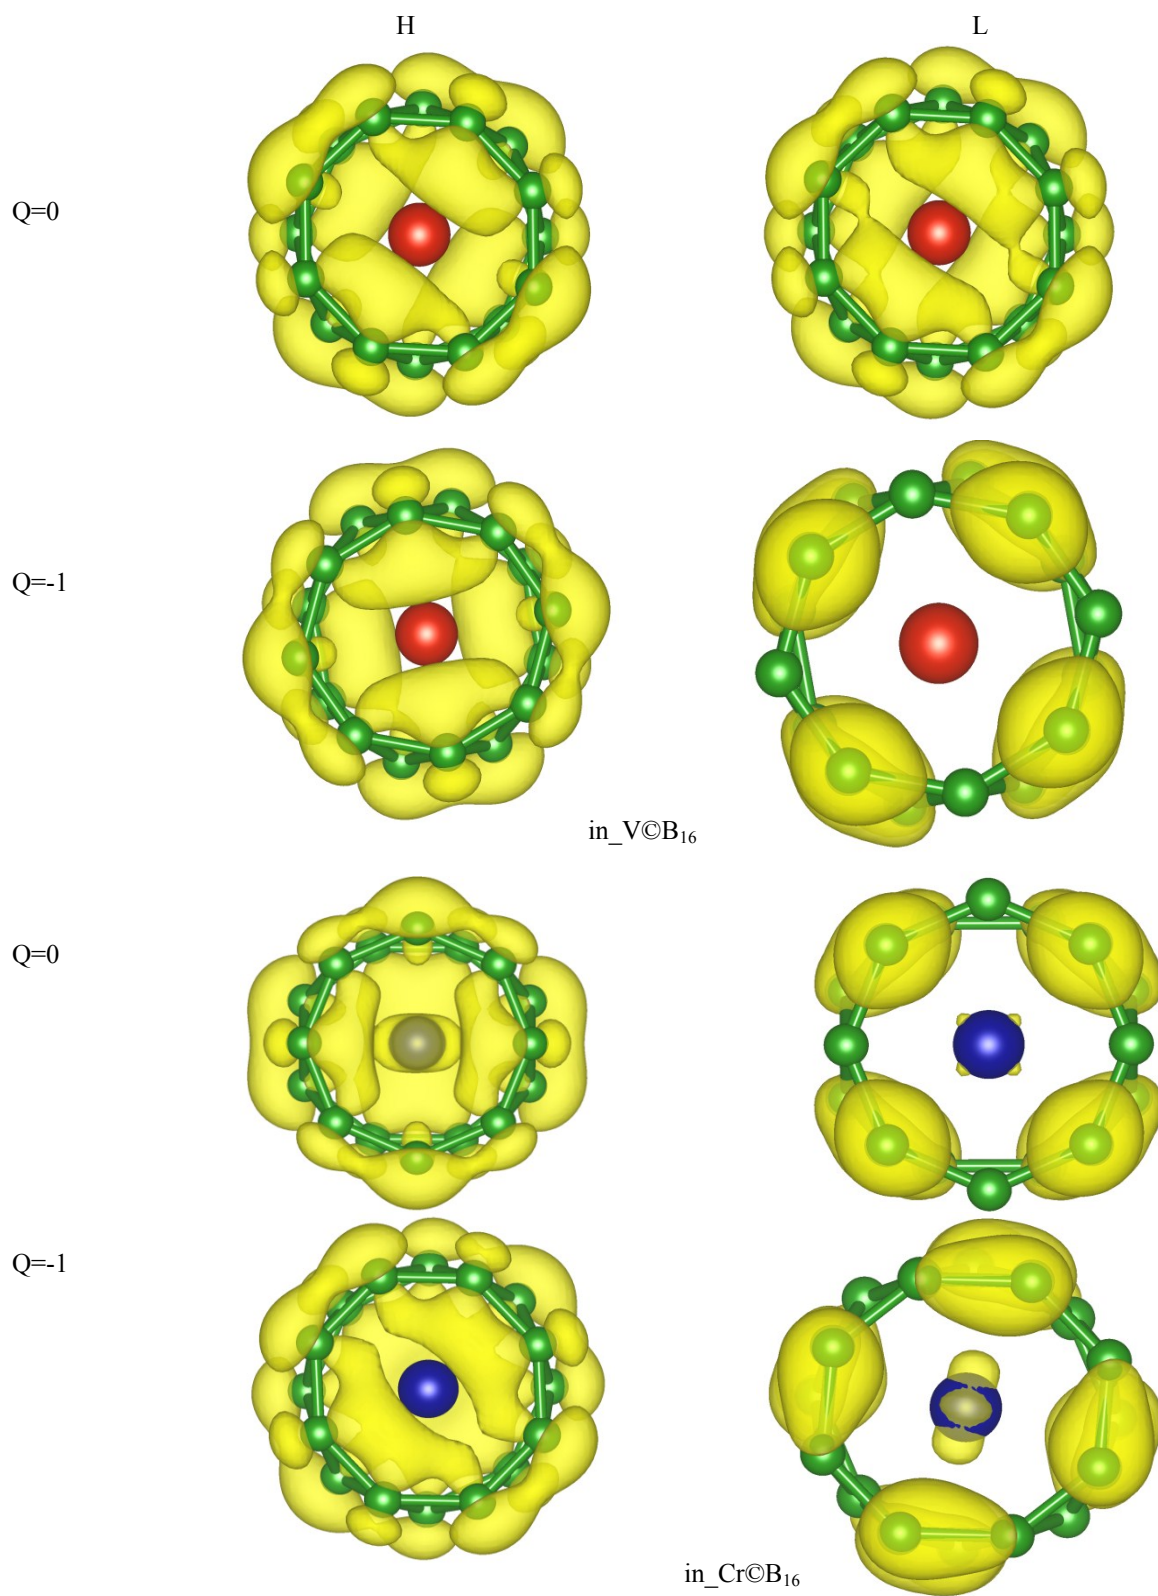

**Figure S5:** HSE06-DFT calculated contour plots of HOMO and LUMOs orbitals of neutral (Q=0) and negative (Q=-1) most stable structure of Mn@B<sub>16</sub> and Fe@B<sub>16</sub> clusters.
